# Supplementary material for: Direct experimental observation of mesoscopic fluorous domains in fluorinated room temperature ionic liquids
Source: Royal Society of Chemistry journal article supplement (doi:10.1039/c7cp01971h), 2017-01-01
Supplement: c7cp01971h1.pdf [file c7cp01971h1.pdf]

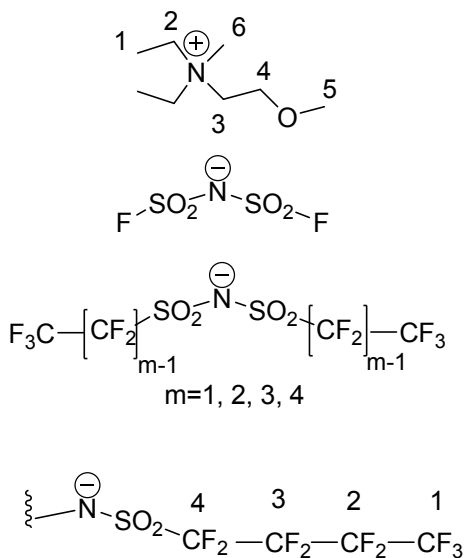

Scheme 1. Molecular structures and atom numbering for cation and anions of the ILs used in this work. From top to bottom: Sketch of DEME cation. Sketch of IM<sub>00</sub> anion. General formula for anions IM<sub>11</sub>-IM<sub>44</sub>. Atom numbering for the perfluoroalkyl chains, shown in the nonafluorobutyl case (m=4).
